# Supplementary material for: Morphological evolution of bifurcations in tide-influenced deltas
Source: Copernicus journal article supplement (doi:10.5194/esurf-8-413-2020), 2020-06-02
Supplement: Supplementary file 1 [file esurf-8-413-2020-supplement.zip]

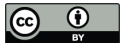

## *Supplement of*

# **Morphological evolution of bifurcations in tide-influenced deltas**

**Arya P. Iwantoro et al.**

*Correspondence to:* Arya P. Iwantoro (a.p.iwantoro@uu.nl)

- esurf-8-413-2020-supplement-title-page.pdf
- model\_setup\_esurf-2019-63\_Iwantoro\_et al
  - Scenario\_Amplitude\_diff
    - \* NewSymmetry\_down\_26July.dep
    - \* NewSymmetry\_down\_26July.enc
    - \* NewSymmetry\_down\_26July.grd
    - \* NewSymmetry\_down\_26July.ini
    - \* Q2800\_depthdisturbed.ddb
    - \* Q2800\_down.dep
    - \* Q2800\_down\_depthdisturbed.dep
    - \* Q2800\_down\_depthdisturbed.mdf
    - \* Q2800\_down\_lengthdisturbed.dep
    - \* Q2800\_up.dep
    - \* Q2800\_up\_depthdisturbed.mdf
    - \* amp\_025m.ddb
    - \* amp\_05.bnd
    - \* amp\_05.xml
    - \* amp\_05m.ddb
    - \* amp\_075m.ddb
    - \* amp\_1m.ddb
    - \* down.bca
    - \* down.bcc
    - \* down.bnd
    - \* down.obs
    - \* down\_amp\_025m.bca
    - \* down\_amp\_025m.bcc
    - \* down\_amp\_025m.bnd
    - \* down\_amp\_025m.mdf

- \* down\_amp\_05m.bca
- \* down\_amp\_05m.bcc
- \* down\_amp\_05m.mdf
- \* down\_amp\_075m.bca
- \* down\_amp\_075m.bcc
- \* down\_amp\_075m.bnd
- \* down\_amp\_075m.mdf
- \* down\_amp\_1m.mdf
- \* down\_short.bcc
- \* long\_new.mor
- \* run\_flow2d3d.bat
- \* sedprop.sed
- \* up.bcc
- \* up.bct
- \* up.bnd
- \* up.dep
- \* up.enc
- \* up.grd
- \* up.ini
- \* up.obs
- \* up\_amp\_025m.mdf
- \* up\_amp\_05m.mdf
- \* up\_amp\_075m.mdf
- \* up\_amp\_1m.mdf
- Scenario\_Control\_and\_Depth2
  - \* NewLength\_down\_26July.grd
  - \* NewSymmetry\_down\_26July.dep
  - \* NewSymmetry\_down\_26July.enc
  - \* NewSymmetry\_down\_26July.grd
  - \* NewSymmetry\_down\_26July.ini
  - \* Q1596\_5yr\_down.dep
  - \* Q1596\_5yr\_down\_depthdisturbed.dep
  - \* Q1596\_5yr\_up.dep
  - \* Q1596\_depthdiff1meter\_eq.dep
  - \* Q1596\_up\_depthdiff1meter\_eq.dep
  - \* Q2800\_depthdisturbed.ddb
  - \* Q2800\_depthdisturbed.xml
  - \* Q2800\_depthdisturbed\_cont.ddb
  - \* Q2800\_depthdisturbed\_cont.xml
  - \* Q2800\_down\_depthdiff1meter\_eq.dep
  - \* Q2800\_down\_depthdisturbed.dep
  - \* Q2800\_down\_depthdisturbed.mdf
  - \* Q2800\_down\_depthdisturbed\_cont.mdf
  - \* Q2800\_down\_lengthdisturbed.dep
  - \* Q2800\_up.dep
  - \* Q2800\_up\_depthdiff1meter\_eq.dep
  - \* Q2800\_up\_depthdisturbed.mdf

- \* Q2800\_up\_depthdisturbed\_cont.mdf
- \* amp\_1m.ddb
- \* amp\_1m\_1596.ddb
- \* amp\_1m\_1596\_depthdisturbed.ddb
- \* amp\_1m\_1596\_depthdisturbed\_cont.ddb
- \* config\_Q1596.xml
- \* config\_Q1596\_depthdisturbed\_cont.xml
- \* config\_flow2d3d.ini
- \* config\_flow2d3d.xml
- \* delft3d.log
- \* down.bca
- \* down.bcc
- \* down.bnd
- \* down.obs
- \* down\_amp\_1m.mdf
- \* down\_amp\_1m\_Q1596.mdf
- \* down\_amp\_1m\_Q1596\_depthdisturbed.mdf
- \* down\_amp\_1m\_Q1596\_depthdisturbed\_cont.mdf
- \* down\_depth2Q1596\_cont.bca
- \* down\_depth2Q1596\_cont.bcc
- \* down\_depth2Q1596\_cont.bnd
- \* down\_depth2\_Q2800\_cont.bca
- \* down\_depth2\_Q2800\_cont.bcc
- \* down\_depth2\_Q2800\_cont.bnd
- \* flow\_gui.out
- \* long\_new.mor
- \* run\_flow2d3d.bat
- \* sedprop.sed
- \* tri-rst.Q2800\_down\_depthdisturbed.20200101.000000
- \* tri-rst.Q2800\_up\_depthdisturbed.20200101.000000
- \* tri-rst.down\_amp\_1m\_Q1596\_depthdisturbed.20200101.000000
- \* tri-rst.up\_amp\_1m\_Q1596\_depthdisturbed.20200101.000000
- \* up.bcc
- \* up.bct
- \* up.bnd
- \* up.dep
- \* up.enc
- \* up.grd
- \* up.ini
- \* up.obs
- \* up\_Q1596.bcc
- \* up\_Q1596.bct
- \* up\_Q1596.bnd
- \* up\_amp\_1m.mdf
- \* up\_amp\_1m\_Q1596.mdf
- \* up\_amp\_1m\_Q1596\_depthdisturbed.mdf
- \* up\_amp\_1m\_Q1596\_depthdisturbed\_cont.mdf

- \* up\_depth2Q1596\_cont.bcc
- \* up\_depth2Q1596\_cont.bct
- \* up\_depth2Q1596\_cont.bnd
- \* up\_depth2\_Q2800\_cont.bcc
- \* up\_depth2\_Q2800\_cont.bct
- \* up\_depth2\_Q2800\_cont.bnd
- \* up\_length.grd

– Scenario\_Depth1

- \* config\_flow2d3d.xml
- \* delft3d.log
- \* down.bca
- \* down.bcc
- \* down.bnd
- \* down.obs
- \* down\_26july.mdf
- \* down\_26july\_01mm\_sand.mdf
- \* down\_26july\_05mm\_sand.mdf
- \* down\_26july\_low\_alphabn.mdf
- \* down\_depth\_1596.mdf
- \* down\_depth\_lowdischarge.mdf
- \* down\_depth\_lowdischarge\_continue2.mdf
- \* down\_lowdischarge2.bca
- \* down\_lowdischarge2.bcc
- \* down\_lowdischarge2.bnd
- \* down\_wide26july.dep
- \* down\_wide26july.ini
- \* down\_wide26july\_ort.enc
- \* down\_wide26july\_ort.grd
- \* flow\_gui.out
- \* gppdebug.inf
- \* gppmess.inf
- \* long\_new\_26july.mor
- \* long\_new\_26july\_low\_alphabn.mor
- \* sedprop.sed
- \* sedprop\_01mm.sed
- \* sedprop\_05mm.sed
- \* smalldischarge\_down.dep
- \* smalldischarge\_up.dep
- \* tide.dia
- \* tide1\_1596.ddb
- \* tide1\_26july.ddb
- \* tide1\_26july\_01mm.ddb
- \* tide1\_26july\_05mm.ddb
- \* tide1\_26july\_alphabn\_1.ddb
- \* tide1\_lowdischarge.ddb
- \* tide1\_lowdischarge\_continue2.ddb
- \* tri-rst.down\_depth\_lowdischarge.20200101.000000

- \* tri-rst.up\_depth\_lowdischarge.20200101.000000
- \* up.bcc
- \* up.bct
- \* up.bnd
- \* up.dep
- \* up.enc
- \* up.grd
- \* up.ini
- \* up.obs
- \* up\_1596.bcc
- \* up\_1596.bct
- \* up\_1596.bnd
- \* up\_26july.mdf
- \* up\_26july\_01mm\_sand.mdf
- \* up\_26july\_05mm\_sand.mdf
- \* up\_26july\_low\_alphabn.mdf
- \* up\_depth\_1596.mdf
- \* up\_depth\_lowdischarge.mdf
- \* up\_depth\_lowdischarge\_continue2.mdf
- \* up\_lowdischarge.bcc
- \* up\_lowdischarge.bct
- \* up\_lowdischarge.bnd
- \* up\_lowdischarge2.bcc
- \* up\_lowdischarge2.bct
- \* up\_lowdischarge2.bnd
- Scenario\_Length2
  - \* NewLength\_down.ini
  - \* NewLength\_down\_26July.enc
  - \* NewLength\_down\_26July.grd
  - \* NewLength\_down\_26July.ini
  - \* Q1596\_5yr\_down.dep
  - \* Q1596\_5yr\_up.dep
  - \* Q1596\_down\_lengthdisturbed.mdf
  - \* Q1596\_lengthdisturbed.ddb
  - \* Q1596\_lengthdisturbed.xml
  - \* Q1596\_up\_lengthdisturbed.mdf
  - \* Q2800\_down.dep
  - \* Q2800\_down\_lengthdisturbed.mdf
  - \* Q2800\_lengthdisturbed.ddb
  - \* Q2800\_lengthdisturbed.xml
  - \* Q2800\_up.dep
  - \* Q2800\_up\_lengthdisturbed.mdf
  - \* down.obs
  - \* down\_length\_1m.bca
  - \* down\_length\_1m.bcc
  - \* down\_length\_1m.bnd
  - \* long\_new\_26July.mor

- \* run\_flow2d3d.bat
- \* sedprop.sed
- \* tri-rst.Q1596\_down\_lengthdisturbed.20200101.000000
- \* tri-rst.Q1596\_up\_lengthdisturbed.20200101.000000
- \* tri-rst.Q2800\_down\_lengthdisturbed.20200101.000000
- \* tri-rst.Q2800\_up\_lengthdisturbed.20200101.000000
- \* up.enc
- \* up.grd
- \* up.ini
- \* up.obs
- \* up\_river.bcc
- \* up\_river.bct
- \* up\_river.bnd
- Scenario\_Phase\_diff
  - \* NewSymmetry\_down.dep
  - \* NewSymmetry\_down.enc
  - \* NewSymmetry\_down.grd
  - \* NewSymmetry\_down.ini
  - \* NewSymmetry\_down\_26July.dep
  - \* NewSymmetry\_down\_26July.enc
  - \* NewSymmetry\_down\_26July.grd
  - \* NewSymmetry\_down\_26July.ini
  - \* config\_flow2d3d.xml
  - \* down.bca
  - \* down.bcc
  - \* down.bnd
  - \* down.obs
  - \* down\_amp\_1m.mdf
  - \* down\_phase\_10.bca
  - \* down\_phase\_10.bcc
  - \* down\_phase\_10.bnd
  - \* down\_phase\_10.mdf
  - \* down\_phase\_225.bca
  - \* down\_phase\_225.bcc
  - \* down\_phase\_225.bnd
  - \* down\_phase\_225.mdf
  - \* down\_phase\_35.bca
  - \* down\_phase\_35.bcc
  - \* down\_phase\_35.bnd
  - \* down\_phase\_35.mdf
  - \* long\_new.mor
  - \* phase\_10.ddb
  - \* phase\_35.ddb
  - \* sedprop.sed
  - \* up.bcc
  - \* up.bct
  - \* up.bnd

- \* up.dep
- \* up.enc
- \* up.grd
- \* up.ini
- \* up.obs
- \* up\_amp\_1m.mdf
- \* up\_phase\_10.mdf
- \* up\_phase\_225.mdf
- \* up\_phase\_35.mdf

The copyright of individual parts of the supplement might differ from the CC BY 4.0 License.
